# Supplementary material for: Factors Predictive of Severe Hypoglycemia in Type 1 Diabetes: Analysis from the Juvenile Diabetes Research Foundation continuous glucose monitoring randomized control trial dataset
Source: PubMed Central journal article supplement — Diabetes Care. 2011 Feb 17;34(3):586–90. doi: 10.2337/dc10-1111 (PMC3041185; doi:10.2337/dc10-1111), 2011-02-17

## SUPPLEMENTARY DATA

### *The JDRF Continuous Glucose Monitoring Study Group*

*Clinical Centers:* Listed in order of number of patients enrolled with clinical center name, city, and state. Personnel are listed as (PI) for Principal Investigator, (I) for co-Investigator and (C) for Coordinators:

*Diabetes Care Center, University of Washington, Seattle, WA:* Irl B. Hirsch, M.D. (PI); Lisa K. Gilliam, M.D., Ph.D. (I); Kathy Fitzpatrick, R.N., M.N., C.D.E. (C); Dori Khakpour, R.D., C.D., C.D.E. (C); Department of Pediatrics, *Yale University School of Medicine, New Haven, CT:* Stuart A. Weinzimer, M.D. (PI); William V. Tamborlane, M.D. (I); Brett Ives, M.S.N., A.P.R.N. (C); Joan Bosson-Heenan (C); *Adult Section, Joslin Diabetes Center, Boston, MA:* Howard Wolpert, M.D. (PI); Greeshma Shetty, M.D. (I); Astrid Atakov-Castillo (C); Judith Giusti, M.S., R.D., L.D.N., C.D.E. (C); Stacey O'Donnell, R.N., C.D.E. (C); Suzanne Ghiloni, R.N., C.D.E. (C); *Atlanta Diabetes Associates, Atlanta, GA:* Bruce W. Bode, M.D. (PI); Kelli O'Neil, C.D.E. (C); Lisa Tolbert, R.N., M.N., C.D.E. (C); *Nemours Children's Clinic, Jacksonville, FL:* Tim Wysocki, Ph.D. (co-PI); Larry A. Fox, M.D. (co-PI); Nelly Mauras, M.D. (I); Kimberly Englert, R.N. (C); Joe Permuy, M.S.N., A.R.N.P. (C); *Division of Pediatric Endocrinology and Diabetes, Stanford University, Stanford, CA:* Bruce Buckingham, M.D. (PI); Darrell M. Wilson, M.D. (I); Jennifer Block, R.N., C.D.E. (C); Kari Benassi, R.N., N.P. (C); *Department of Pediatrics, University of Iowa Carver College of Medicine, Iowa City, IA:* Eva Tsalikian, M.D. (PI); Michael Tansey, M.D. (I); Debra Kucera, A.R.N.P., C.P.N.P. (C); Julie Coffey, A.R.N.P., C.P.N.P. (C); Joanne Cabbage (C); *Pediatric Adolescent, and Young Adult Section, Joslin Diabetes Center, Boston, MA:* Lori Laffel, M.D., M.P.H., (PI), Kerry Milaszewski, R.N., C.D.E. (C); Katherine Pratt (C); Elise Bismuth, M.D., M.S., (C); Joyce Keady, M.S.N., C.P.N.P. (C); Margie Lawlor, M.S., C.D.E. (C); *Barbara Davis Center for Childhood Diabetes, University of Colorado, Denver, CO:* H. Peter Chase, M.D. (PI); Rosanna Fiallo-Scharer, M.D. (I); Paul Wadwa, M.D. (I); Laurel Messer, R.N., C.D.E. (C); Victoria Gage, R.N. (C); Patricia Burdick (C); *Departments of Pediatric Endocrinology and Research and Evaluation, Kaiser Permanente, San Diego and Pasadena, CA:* Jean M. Lawrence, Sc.D., M.P.H., M.S.S.A. (co-PI); Robert Clemons, M.D. (co-PI); Michelle Maeva, R.N., C.D.E. (C); Bonnie Sattler, M.S., R.D. (C); *Coordinating Center:* Jaeb Center for Health Research, Tampa, FL: Roy W. Beck, M.D., Ph.D.; Katrina J. Ruedy, M.S.P.H.; Craig Kollman, Ph.D.; Dongyuan Xing, M.P.H.; Judy Sibayan, M.P.H.; *University of Minnesota Central Laboratory:* Michael Steffes, M.D., Ph.D., Jean M. Bucksa, C.L.S., Maren L. Nowicki, C.L.S., Carol Van Hale, C.L.S., Vicky Makky, C.L.S.

*Cost-effectiveness investigators: National Opinion Research Center, University of Chicago:* Michael O'Grady, Ph.D.; Elbert Huang, M.D., M.P.H.; Anirban Basu, Ph.D.; David O. Meltzer, M.D., Ph.D.; Lan Zhao, Ph.D. *University of Michigan:* Joyce Lee, M.D., M.P.H.

*Juvenile Diabetes Research Foundation, Inc.:* Aaron J. Kowalski, Ph.D.

*Operations Committee:* Lori Laffel, M.D., M.P.H. (co-chair), William V. Tamborlane, M.D. (co-chair), Roy W. Beck, M.D., Ph.D., Aaron J. Kowalski, Ph.D., Katrina J. Ruedy, M.S.P.H.

*Data and Safety Monitoring Board:* Ruth S. Weinstock, M.D., Ph.D. (chair), Barbara J Anderson, Ph.D.; Davida Kruger, M.S.N., A.P.R.N.; Lisa LaVange, Ph.D.; Henry Rodriguez, M.D.

SUPPLEMENTARY DATA

**Supplementary Table 1. Baseline characteristics according to whether a severe hypoglycemia (SH) event occurred #**

|                                                                                                                              | <b>Total <sup>†</sup></b> | <b>No SH Events<br/>During Study</b> | <b>≥1 SH Event<br/>During Study</b> |
|------------------------------------------------------------------------------------------------------------------------------|---------------------------|--------------------------------------|-------------------------------------|
|                                                                                                                              | N=436                     | N=382                                | N=54                                |
| <b>Age (years, Mean ± SD)</b>                                                                                                | 25.6 ± 15.9               | 25.0 ± 15.5                          | 29.6 ± 18.3                         |
| 8 to 14 years                                                                                                                | 138 (32%)                 | 124 (32%)                            | 14 (26%)                            |
| 15 to 24 years                                                                                                               | 138 (32%)                 | 121 (32%)                            | 17 (31%)                            |
| ≥25 years                                                                                                                    | 160 (37%)                 | 137 (36%)                            | 23 (43%)                            |
| <b>Diabetes duration (years, Mean ± SD)</b>                                                                                  | 13.7 ± 11.8               | 13.3 ± 11.7                          | 16.6 ± 11.9                         |
| <b>Gender</b>                                                                                                                |                           |                                      |                                     |
| Female                                                                                                                       | 237 (54%)                 | 201 (53%)                            | 36 (67%)                            |
| Male                                                                                                                         | 199 (46%)                 | 181 (47%)                            | 18 (33%)                            |
| <b># Severe hypoglycemia events in 6 months prior to study (self-reported)</b>                                               |                           |                                      |                                     |
| 0                                                                                                                            | 400 (92%)                 | 361 (95%)                            | 39 (72%)                            |
| 1                                                                                                                            | 24 (6%)                   | 17 (4%)                              | 7 (13%)                             |
| ≥ 2                                                                                                                          | 12 (3%)                   | 4 (1%)                               | 8 (15%)                             |
| <b>Home blood glucose meter measurements per day (self-reported) * Median (25<sup>th</sup>, 75<sup>th</sup> percentiles)</b> | 6 (5,8)                   | 6 (5,8)                              | 6 (5,8)                             |
| ≤5                                                                                                                           | 135 (31%)                 | 112 (29%)                            | 23 (43%)                            |
| 6-8                                                                                                                          | 179 (41%)                 | 164 (43%)                            | 15 (28%)                            |
| >8                                                                                                                           | 69 (16%)                  | 60 (16%)                             | 9 (17%)                             |
| <b>Insulin delivery</b>                                                                                                      |                           |                                      |                                     |
| Pump                                                                                                                         | 356 (82%)                 | 313 (82%)                            | 43 (80%)                            |
| Multiple Daily Injections                                                                                                    | 80 (18%)                  | 69 (18%)                             | 11 (20%)                            |
| <b>HbA1c (% , mean ± SD)</b>                                                                                                 | 7.4 ± 0.9                 | 7.4 ± 0.9                            | 7.3 ± 0.9                           |
| <i>N (%)</i>                                                                                                                 |                           |                                      |                                     |
| <7.0%                                                                                                                        | 127 (29%)                 | 111 (29%)                            | 16 (30%)                            |
| 7.0%-<8.0%                                                                                                                   | 197 (45%)                 | 169 (44%)                            | 28 (52%)                            |
| ≥ 8.0%                                                                                                                       | 112 (26%)                 | 102 (27%)                            | 10 (19%)                            |
|                                                                                                                              |                           |                                      |                                     |
| <b>Hypoglycemia Fear Scale Score<sup>†</sup></b>                                                                             | 28.1 ± 17.3               | 27.5 ± 17.0                          | 32.8 ± 18.9                         |
| <i>(mean ± SD)</i>                                                                                                           |                           |                                      |                                     |
| <b>Baseline % CGM values ≤70 mg/dL<sup>‡</sup></b>                                                                           |                           |                                      |                                     |
| Median (25 <sup>th</sup> , 75 <sup>th</sup> percentiles)                                                                     | 4% (1%, 9%)               | 4% (1%, 9%)                          | 8% (3%, 11%)                        |
| None                                                                                                                         | 25 (6%)                   | 23 (6%)                              | 2 (4%)                              |

SUPPLEMENTARY DATA

|                                 |                |                |                |
|---------------------------------|----------------|----------------|----------------|
| <5%                             | 207 (47%)      | 188 (49%)      | 19 (35%)       |
| 5%-<15%                         | 160 (37%)      | 134 (35%)      | 26 (48%)       |
| ≥15%                            | 44 (10%)       | 37 (10%)       | 7 (13%)        |
| Coefficient of Variation (CV)   |                |                |                |
| Median (25th, 75th percentiles) | 39% (35%, 45%) | 39% (34%, 45%) | 40% (37%, 46%) |
| 0-<35%                          | 116 (27%)      | 108 (28%)      | 8 (15%)        |
| 35%-<40%                        | 115 (26%)      | 100 (26%)      | 15 (28%)       |
| 40%-<45%                        | 88 (20%)       | 74 (19%)       | 14 (26%)       |
| ≥45%                            | 117 (27%)      | 100 (26%)      | 17 (31%)       |

# P-value associated with each factor as listed in table 1

¶ Column percentages may not add up to 100% due to rounding.

\* Self-reported number of HGM tests per day. Data collected after study initialization and are therefore missing for 53 subjects.

† Hypoglycemia Fear Questionnaire (16) consists of 15 5-point Likert scale items, with scores scaled to a 0 to 100 range. Higher score denotes more fear of hypoglycemia. Missing for 5 subjects.

‡ CGM data based on blinded use at baseline for approximately one week prior to randomization. Results were similar for hypoglycemic AUC and LBGI (data not shown) (3).

SUPPLEMENTARY DATA

**Supplementary Table 2. Sensitivity, specificity, false alarm rates and positive predictive value of CGM-measured hypoglycemia on one day (AUC, LBG1 and whether glucose  $\leq$  54 mg/dL for at least 30 consecutive minutes) for the occurrence of severe hypoglycemia (SH) on the following day**

| Hypoglycemic AUC based on CGM readings on prior day | # of Days    |              |           | Sensitivity* | Specificity <sup>†</sup> | False Alarm <sup>‡</sup> | Positive Predictive Value <sup>§</sup> |
|-----------------------------------------------------|--------------|--------------|-----------|--------------|--------------------------|--------------------------|----------------------------------------|
|                                                     | Total        | No SH        | SH        |              |                          |                          |                                        |
| $\leq 0$                                            | 2,177        | 2,166        | 11        |              |                          |                          |                                        |
| $> 0$                                               | 3,118        | 3,102        | 16        | 59%          | 41%                      | 99.5%                    | 0.5%                                   |
| $\leq 0.25$                                         | 3,230        | 3,216        | 14        |              |                          |                          |                                        |
| $> 0.25$                                            | 2,065        | 2,052        | 13        | 48%          | 61%                      | 99.4%                    | 0.6%                                   |
| $\leq 1.0$                                          | 4,210        | 4,193        | 17        |              |                          |                          |                                        |
| $> 1.0$                                             | 1,085        | 1,075        | 10        | 37%          | 80%                      | 99.1%                    | 0.9%                                   |
| $\leq 2.0$                                          | 4,726        | 4,708        | 18        |              |                          |                          |                                        |
| $> 2.0$                                             | 569          | 560          | 9         | 33%          | 89%                      | 98.4%                    | 1.6%                                   |
| <b>All</b>                                          | <b>5,295</b> | <b>5,268</b> | <b>27</b> |              |                          |                          |                                        |
|                                                     |              |              |           |              |                          |                          |                                        |
| LBGI based on CGM data on prior day                 | # of Days    |              |           | Sensitivity* | Specificity <sup>†</sup> | False Alarm <sup>‡</sup> | Positive Predictive Value <sup>§</sup> |
|                                                     | Total        | No SH        | SH        |              |                          |                          |                                        |
| $\leq 1.0$                                          | 2,904        | 2,891        | 13        |              |                          |                          |                                        |
| $> 1.0$                                             | 2,391        | 2,377        | 14        | 52%          | 55%                      | 99.4%                    | 0.6%                                   |
| $\leq 2.5$                                          | 4,280        | 4,263        | 17        |              |                          |                          |                                        |
| $> 2.5$                                             | 1,015        | 1,005        | 10        | 37%          | 81%                      | 99.0%                    | 1.0%                                   |
| $\leq 5.0$                                          | 5,005        | 4,984        | 21        |              |                          |                          |                                        |
| $> 5.0$                                             | 290          | 284          | 6         | 22%          | 95%                      | 97.9%                    | 2.1%                                   |
| <b>All</b>                                          | <b>5,295</b> | <b>5,268</b> | <b>27</b> |              |                          |                          |                                        |

SUPPLEMENTARY DATA

| 30 consecutive minutes $\leq$ 54 mg/dL<br>base on CGM data on prior day | # of Days |       |    | Sensitivity* | Specificity† | False Alarm‡ | Positive<br>Predictive |
|-------------------------------------------------------------------------|-----------|-------|----|--------------|--------------|--------------|------------------------|
|                                                                         | Total     | No SH | SH |              |              |              |                        |
| No                                                                      | 4,473     | 4,454 | 19 |              |              |              |                        |
| Yes                                                                     | 822       | 814   | 8  | 30%          | 85%          | 99.0%        | 1.0%                   |
| All                                                                     | 5,295     | 5,268 | 27 |              |              |              |                        |

\*- Sensitivity= Proportion of true SH events where the CGM indices correctly predicted the prior days as positive.

†- Specificity= Proportion of days without SH where the CGM indices correctly predicted the prior days as negative.

‡- False Alarm= Proportion of days with CGM indices predicted as positive where there were no SH in the following days.

§- Positive Predictive Value= Proportion of days with CGM indices predicted as positive where there were SH events in the following days (this is 100% minus the false alarm rate).

||- Davis et al., Diabetes, 2000; 49: 1897-1903(18)

SUPPLEMENTARY DATA

**Supplementary Figure 1. The incidence of severe hypoglycemia in this study was substantially lower than that of the intensive treatment group in the Diabetes Control and Complications Trial (61.2/100 person-years). HbA1c values in x-axis were calculated by averaging monthly HbA1c during mean of 6.5 follow-up years in DCCT and quarterly HbA1c in JDRT CGM RCT during 1 year follow-up period.**

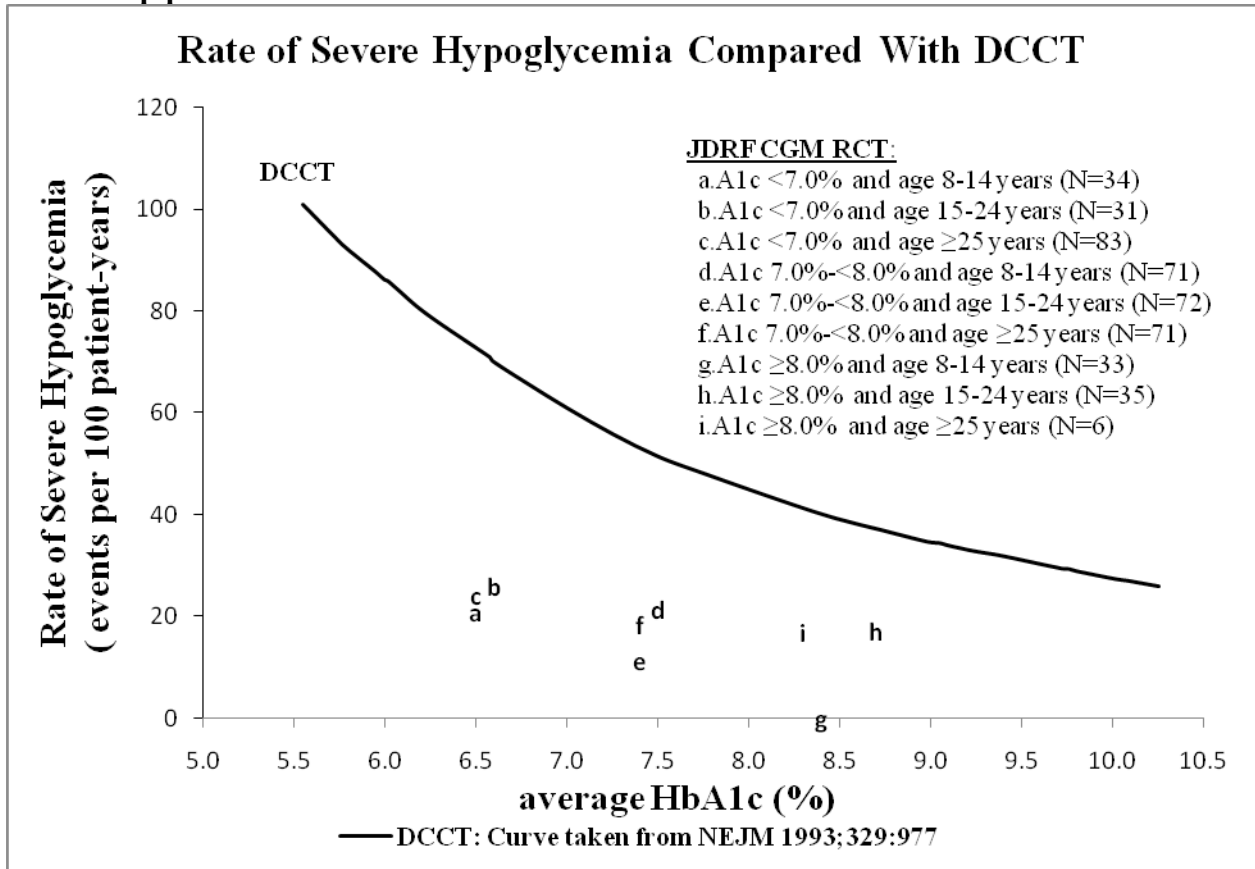

Supplement: supp_dc10-1111v101111_DC101111SupplementaryData.pdf [file supp_dc10-1111v101111_DC101111SupplementaryData.pdf]
